## Erratum to: Evaluation of the redox state in mouse organs following radon inhalation

Takahiro Kataoka<sup>1,\*</sup>, Norie Kanzaki<sup>2</sup>, Akihiro Sakoda<sup>2</sup>, Hina Shuto<sup>1</sup>,  
Junki Yano<sup>1</sup>, Shota Naoe<sup>1</sup>, Hiroshi Tanaka<sup>2</sup>, Katsumi Hanamoto<sup>1</sup>,  
Hiroaki Terato<sup>3</sup>, Fumihito Mitsunobu<sup>4</sup> and Kiyonori Yamaoka<sup>1</sup>

<sup>1</sup>Graduate School of Health Sciences, Okayama University, 5-1 Shikata-cho 2-chome, Kita-ku, Okayama-shi, Okayama 700-8558, Japan

<sup>2</sup>Ningyo-toke Environmental Engineering Center, Japan Atomic Energy Agency, 1550 Kamisaibara, Kagamino-cho, Tomata-gun, Okayama 708-0698, Japan

<sup>3</sup>Advanced Science Research Center, Okayama University, 5-1 Shikata-cho 2-chome, Kita-ku, Okayama-shi, Okayama 700-8558, Japan

<sup>4</sup>Graduate School of Medicine Dentistry and Pharmaceutical Sciences, Okayama University, 5-1 Shikata-cho 2-chome, Kita-ku, Okayama-shi, Okayama 700-8558, Japan

\*Corresponding author. Research Associate Professor, Graduate School of Health Sciences, Okayama University, 5-1 Shikata-cho, 2-chome, Kita-ku, Okayama 700-8558, Japan. Tel: +81-86-235-7208; Email: [kataoka@md.okayama-u.ac.jp](mailto:kataoka@md.okayama-u.ac.jp)

*Journal of Radiation Research*, Volume 62, Issue 2, March 2021, Pages 206-216, doi: [10.1093/jrr/rraa129](https://doi.org/10.1093/jrr/rraa129).

Due to a technical error, the paper 10.1093/jrr/rraa129, which was first published in *Journal of Radiation Research* Volume 62 Issue 2 was mistakenly republished in *Journal of Radiation Research* Volume 62 Issue 3. Upon identification of this error, 10.1093/jrr/rraa129 was removed from Issue 3, where it should not have appeared. It remains in its correct place of first publication - Volume 62 Issue 2.

Page numbers were assigned to 10.1093/jrr/rraa129 within Volume 62 Issue 3. When 10.1093/jrr/rraa129 was removed from Volume 62 Issue 3 no changes were made to the page numbers of the papers that followed. The page numbers: 390-400, which were assigned to 10.1093/jrr/rraa129 when it mistakenly appeared in Volume 62 Issue 3, are now left intentionally blank within the volume.
